# Supplementary material
Source: Springer Nature journal article supplement (https://www.springermedizin.de/resource/supplementary/13037_2011_103_MOESM1_ESM.pdf/9659318)

**A**

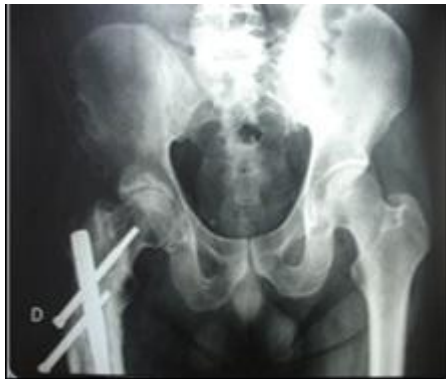

**B**

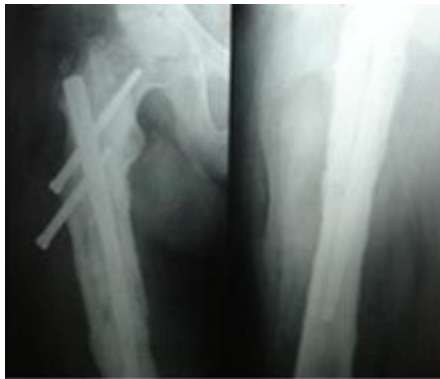

Supplement: MOESM1 [file 9659318]
